# Supplementary material for: A core set of risk factors in individuals at risk of rheumatoid arthritis: a systematic literature review informing the EULAR points to consider for conducting clinical trials and observational studies in individuals at risk of rheumatoid arthritis
Source: HighWire-hosted journal article supplement (doi:10.1136/rmdopen-2021-001768), 2021-09-01
Supplement: rmdopen-2021-001768supp001_data_supplement.pdf [file rmdopen-2021-001768supp001_data_supplement.pdf]

**Supplementary Table 1:** Articles reporting on RA-related autoantibodies alone as risk factors in individuals at-risk of RA: Newcastle-Ottawa Scale for study quality assessment.

| AUTHORS                 | YEAR | SELECTION | COMPARABILITY | OUTCOME | SUM       | RISK OF BIAS                                 |
|-------------------------|------|-----------|---------------|---------|-----------|----------------------------------------------|
| del Puente A. et al     | 1988 | ★★★★      | ★★            | ★★★     | ★★★★★★★★★ | Low                                          |
| Kudo-Tanaka E, et al    | 2007 | ★★★       | ---           | ★★      | ★★★★★     | Intermediate                                 |
| van der Linden MP et al | 2009 | ★★★       | ★★            | ★★★     | ★★★★★★★★★ | Low                                          |
| Mjaavatten MD, et al    | 2010 | ★★★★      | ★★            | ★★★     | ★★★★★★★★★ | Low                                          |
| Bos W. et al            | 2010 | ★★★★      | ★★            | ★★★     | ★★★★★★★★★ | Low                                          |
| van de Stadt L, et al   | 2011 | ★★★★      | ---           | ★★★     | ★★★★★★★★★ | Low                                          |
| Shi J, et al            | 2013 | ★★★★      | ★             | ★★★     | ★★★★★★★★★ | Low                                          |
| Ramos-Remus C, et al    | 2015 | ★★★★      | ★★            | ★★★     | ★★★★★★★★★ | Low                                          |
| Ten Brinck R et al      | 2017 | ★★★★      | ★★            | ★★★     | ★★★★★★★★★ | Low                                          |
| Gan R. et al            | 2017 | ★★★★      | ★★            | ★★★     | ★★★★★★★★★ | Low                                          |
| Verheul M.K. et al      | 2018 | ---       | —             | —       | —         | <i>Systematic review &amp; meta-analysis</i> |
| Tanner S, et al         | 2019 | ★★★★      | ---           | ★       | ★★★★★     | Intermediate                                 |
| Hafkenscheid L. et al   | 2019 | ★★★★      | ★             | ★★★     | ★★★★★★★★★ | Low                                          |

**Supplementary Table 2:** Articles reporting on clinical features as risk factors in individuals at-risk of RA: Newcastle-Ottawa Scale for study quality assessment.

| AUTHORS                 | YEAR | SELECTION | COMPARABILITY | OUTCOME | SUM        | RISK OF BIAS                                 |
|-------------------------|------|-----------|---------------|---------|------------|----------------------------------------------|
| Gonzalez-Lopez L, et al | 1999 | ★★★★      | ★★            | ★★★     | ★★★★★★★★★★ | Low                                          |
| El Miedany Y, et al     | 2008 | ★★★★      | ★★            | ★★      | ★★★★★★★★★★ | Low                                          |
| Kuriya B, et al         | 2009 | ★★★★      | ---           | ★★      | ★★★★★★     | Low                                          |
| Salaffi F, et al        | 2010 | ★★★       | ★★            | ★★      | ★★★★★★     | Low                                          |
| Tamai M, et al          | 2010 | ★★★       | ★             | ★★★     | ★★★★★★     | Low                                          |
| Ha YJ, et al            | 2012 | ★★★       | ★★            | ★★★     | ★★★★★★★★★★ | Low                                          |
| van de Stadt L et al    | 2013 | ★★★★      | ★★            | ★★★     | ★★★★★★★★★★ | Low                                          |
| Bizzaro N et al         | 2013 | ★★★★      | ★             | ★★★     | ★★★★★★★★★★ | Low                                          |
| McNally E, et al        | 2014 | ---       | —             | —       | —          | <i>Systematic review &amp; meta-analysis</i> |
| Rakieh C. et al         | 2015 | ★★★★      | ★★            | ★★★     | ★★★★★★★★★★ | Low                                          |
| Yiannopoulos G, et al   | 2015 | ★★★       | ★             | ★★      | ★★★★★★     | Low                                          |
| Burgers LE, et al       | 2017 | ★★★       | —             | ★★★     | ★★★★★★     | Low                                          |
| Nakajima T, et al (A)   | 2019 | ---       | —             | —       | —          | <i>Abstract</i>                              |

**Supplementary Table 3:** Articles reporting on imaging (US and MRI) findings as risk factors in individuals at-risk of RA: Newcastle-Ottawa Scale for study quality assessment (Imaging)

| AUTHORS                 | YEAR | SELECTION | COMPARABILITY | OUTCOME | SUM      | RISK OF BIAS |
|-------------------------|------|-----------|---------------|---------|----------|--------------|
| van de Stadt LA, et al  | 2010 | ★★★★      | —             | ★★      | ★★★★★★   | Low          |
| Freeston J, et al       | 2010 | ★★★       | —             | ★★★     | ★★★★★★   | Low          |
| Filer A, et al          | 2011 | ★★★★      | ★★            | ★★★     | ★★★★★★★★ | Low          |
| Navalho M, et al        | 2013 | ★★★       | —             | ★★      | ★★★★★    | Low          |
| Nam JL, et al           | 2016 | ★★★★      | —             | ★★★     | ★★★★★★   | Low          |
| Zufferey P, et al       | 2017 | ★★★       | ★★            | ★★      | ★★★★★★   | Low          |
| van Beers-Tas MH, et al | 2018 | ★★★★★     | ★             | ★★★     | ★★★★★★★★ | Low          |
| Sahbudin I, et al       | 2018 | ★★★       | ★★            | ★★★     | ★★★★★★★★ | Low          |
| Pentony P, et al (A)    | 2018 | ---       | —             | —       | —        | Abstract     |
| Kisten Y, et al (A)     | 2018 | ---       | —             | —       | —        | Abstract     |
| Hensvold et al (A)      | 2019 | ---       | —             | —       | —        | Abstract     |
| Duquenne L et al (A)    | 2019 | ---       | —             | —       | —        | Abstract     |
| Navalho M, et al        | 2012 | ★★★       | —             | ★★★     | ★★★★★★   | Low          |
| Kleyer A, et al         | 2016 | ★★★       | —             | ★★★     | ★★★★★★   | Low          |
| Van Steenberg H, et     | 2016 | ★★★★      | ★★            | ★★      | ★★★★★★★★ | Low          |
| Boer AC, et al          | 2017 | ★★★       | ★             | ★★★     | ★★★★★★   | Low          |
| Dakkak YJ, et al        | 2019 | ★★★       | ★★            | ★★★     | ★★★★★★★★ | Low          |
| Hunt L, et al (A)       | 2018 | ---       | —             | —       | —        | Abstract     |

**Supplementary table 4:** Other risk factors which have been reported in individuals at-risk of developing RA: Newcastle-Ottawa Scale for study quality assessment.

| AUTHORS                  | YEAR | SELECTION | COMPARABILITY | OUTCOME | SUM      | RISK OF BIAS    |
|--------------------------|------|-----------|---------------|---------|----------|-----------------|
| Deane KD. et al (A)      | 2019 | ---       | —             | —       | —        | <i>Abstract</i> |
| Jacobsen S, et al        | 2001 | ★★★       | —             | ★★★     | ★★★★★★   | Low             |
| van De Stadt L, et al    | 2012 | ★★★★      | ★★            | ★★      | ★★★★★★★★ | <i>Letter</i>   |
| Rakieh C, et al          | 2015 | ★★★★      | ★★            | ★★★     | ★★★★★★★★ | Low             |
| van Beers-Tas, M.H et al | 2016 | ★★★★      | ★             | ★★★     | ★★★★★★★★ | Low             |
| Hunt L, et al            | 2016 | ★★★★      | ★★            | ★★★     | ★★★★★★★★ | Low             |
| Yeo L, et al             | 2016 | ★★★★      | —             | ★★      | ★★★★★★   | Low             |
| Gan R, et al             | 2017 | ★★★★      | ★★            | ★★★     | ★★★★★★★★ | Low             |
| Tak PP, et al            | 2017 | ★★★★      | ★★            | ★★★     | ★★★★★★★★ | Low             |
| de Rooy et, al           | 2012 | ★★★★      | ★             | ★★★     | ★★★★★★★★ | Low             |
| Mangnus L, et al         | 2017 | ★★★       | ★             | ★★★     | ★★★★★★★★ | Low             |
