# Supplementary material for: A core set of risk factors in individuals at risk of rheumatoid arthritis: a systematic literature review informing the EULAR points to consider for conducting clinical trials and observational studies in individuals at risk of rheumatoid arthritis
Source: HighWire-hosted journal article supplement (doi:10.1136/rmdopen-2021-001768), 2021-09-01
Supplement: rmdopen-2021-001768supp002_data_supplement.pdf [file rmdopen-2021-001768supp002_data_supplement.pdf]

**Search Strategy:**

#

**Search terms**

1

("rheumatoid arthritis" OR "rheumatoid nodulosis" OR "caplan's syndrome" OR  
"still's disease" OR "inflammatory arthritis" OR "felty syndrome" OR RA OR  
"rheumatoid vasculitis").ti,ab

2

"ARTHRITIS, RHEUMATOID"/

3

(1 OR 2)

4

(risk OR "risk factors" OR "relative risk").ti,ab

5

RISK/ OR "RISK FACTORS"/

6

(4 OR 5)

7

(diagnose OR diagnosis OR "clinically suspected" OR suspicion OR suspected OR  
undiagnosed OR probabilit\* OR uncertaint\* OR probable OR classification OR  
predict OR predictors OR monitor OR monitoring OR screening OR screened OR  
likelihood).ti,ab

8

DIAGNOSIS/

9

"DIAGNOSTIC SCREENING PROGRAMS"/

10

"DIAGNOSTIC TECHNIQUES AND PROCEDURES"/

11

PROBABILITY/

12

UNCERTAINTY/

13

"PREDICTIVE VALUE OF TESTS"/ OR "REFERENCE VALUES"/

14

"MASS SCREENING"/

15

(7 OR 8 OR 9 OR 10 OR 11 OR 12 OR 13 OR 14)

16

(frequency OR validity OR sensitivity OR specificity).ti,ab

17

"SENSITIVITY AND SPECIFICITY"/

18

(16 OR 17)

19

(3 AND 6 AND 15 AND 18)
